# Supplementary material
Source: Springer Nature journal article supplement (https://www.springerprofessional.de/resource/supplementary/13638_2010_85_MOESM1_ESM.pdf/11897374)
Supplement: MOESM1 [file 11897374]

| <i>User</i> | <i>GM</i> | <i>DS</i> |
|-------------|-----------|-----------|
|-------------|-----------|-----------|

Uploading

**1. System Parameter Generation**

$$\lambda = (f(\cdot), h(\cdot), q)$$

**2. Key Generation**

$$\{gk\}, \{ik, dk\}$$

$$f_{gk_i^j}(ik_i^j, dk_i^j)$$

*Transfer*

**3. Index Generation and Document Encryption**

$$\{d_n, f_{dk_i^j}(D_n), f_{ik_i^j}(w_{n,1}), f_{ik_i^j}(w_{n,2}), \dots\}$$

**4. Database Update**

*Re-encrypt;*

$$\{f_{k_c}(d_n), f_{k_c}(f_{dk_i^j}(D_n)), f_{k_c}(f_{ik_i^j}(w_{n,1})), \dots\}$$

Insert to Database

Downloading

**1. Trapdoor Generation**

$$T_w = (f_{ik_i^1}(w), \dots, f_{ik_i^j}(w))$$

*Re-encrypt;*

$$T_w = (f_{k_c}(f_{ik_i^1}(w)), \dots, f_{k_c}(f_{ik_i^j}(w)))$$

**2. Retrieval**

Index List

Encrypted Document

Return;

$$\{f_{k_c}(f_{dk_i^s}(D_t))\}$$

Decrypt;

$$\{f_{dk_i^s}(D_t)\}$$

**3. Decryption**

$\{D_t\}$
